# Supplementary material for: Generation and aromaticity of 2-silaimidazolium ion, a new π-conjugated silylium ion
Source: Royal Society of Chemistry journal article supplement (doi:10.1039/b415783d), 2004-12-22
Supplement: b415783d.pdf [file b415783d.pdf]

## Supplementary Information

### Generation and aromaticity of 2-silaimidazolium ion, a new p-conjugated silylium ion

Shintaro Ishida, Tohru Nishinaga, Robert West, and Koichi Komatsu

*Institute for Chemical Research, Kyoto University, Uji, Kyoto 611-0011, Japan*

*Organosilicon Research Center, University of Wisconsin-Madison, 1101 University Ave, Madison, Wisconsin 53706*

### Contents

#### 1. Details of experiments

- Synthesis of chlorosilane **4** (S2)
- Generation of 2-silaimidazolium cation **5** (S2)
- Reaction of 2-silaimidazolium cation **5** with *n*-Bu<sub>4</sub>NBr (S3)

#### 2. NMR spectra

- VT-<sup>1</sup>H NMR spectra of chlorosilane **4** in CD<sub>2</sub>Cl<sub>2</sub> (S4)
- <sup>13</sup>C NMR spectrum of **4** in CD<sub>2</sub>Cl<sub>2</sub> at 25 °C (S6)
- VT-<sup>1</sup>H NMR spectra of 2-silaimidazolium cation **5** in CD<sub>2</sub>Cl<sub>2</sub> (S7)
- <sup>13</sup>C NMR spectra of **4** and **5** in CD<sub>2</sub>Cl<sub>2</sub> at -60 °C (S9)
- <sup>13</sup>C DEPT spectra of **5** in CD<sub>2</sub>Cl<sub>2</sub> (S10)
- C-H COSY spectrum of **5** in CD<sub>2</sub>Cl<sub>2</sub> (S11)
- <sup>29</sup>Si NMR spectrum of chlorotriethylsilane and [Et<sub>3</sub>Si(benzene)]<sup>+</sup>•TPFPB<sup>-</sup> in CD<sub>2</sub>Cl<sub>2</sub> (S11)
- <sup>1</sup>H NMR spectra of cation **5** in C<sub>7</sub>D<sub>8</sub> at -60 °C (S12)
- <sup>13</sup>C NMR spectra of cation **5** in C<sub>7</sub>D<sub>8</sub> at -60 °C (S12)

#### 3. Theoretical studies

- Methods (S13)
- Results of NICS and total energy calculations (S13)
- Cartesian coordinates from the optimized structures (S14)

#### 4. References (S19)

## 1. Details of experiments

**General Procedures.** All experiments were performed under argon using a standard vacuum system. THF was dried and distilled over sodiumbenzophenone ketyl. Toluene-*d*<sub>8</sub> was dried in a glass tube with potassium mirror. Dichloromethane was dried in a glass tube over calcium hydride. Sampling of air-sensitive materials was carried out in a glove box. <sup>1</sup>H (400 MHz), <sup>13</sup>C (99.5 MHz), and <sup>29</sup>Si (78.5 MHz) NMR spectra were recorded on a JEOL JNM-AL 400 spectrometer. High-resolution mass spectra were obtained on a JEOL JMS-700 mass spectrometer. Melting point was determined on a Yanaco MP-500D apparatus and uncorrected. Elemental analysis was carried out at the Microanalytical Laboratory of the Institute for Chemical Research, Kyoto University.

**Synthesis of chlorosilane 4.** In a two-necked flask equipped with a magnetic stirring bar, a rubber septum, and a reflux condenser, diaminosilylene **3** was prepared from dichlorosilane **A** (9.20 g, 34.6 mmol) and potassium (2.74 g, 70.3 mmol) in THF (100 ml) according to the published procedure.<sup>1</sup> Into the flask containing freshly prepared **3**, bis(trimethylsilyl)methyl chloride (6.8 g, 35.0 mmol) was introduced using a syringe and the solution was refluxed for 24 h. After completion of the reaction, the solvent was evaporated under reduced pressure, and hexane (100 ml) was added. Precipitated insoluble materials were removed by filtration. The filtrate was evaporated under reduced pressure to give crude product as a pale yellow solid, which was then chromatographed over SiO<sub>2</sub> eluted with hexane to afford chlorosilane **4** (10.0 g, 25.6 mmol) in 74% yield as colorless crystals. The physical data are given in reference 7 of the main text.

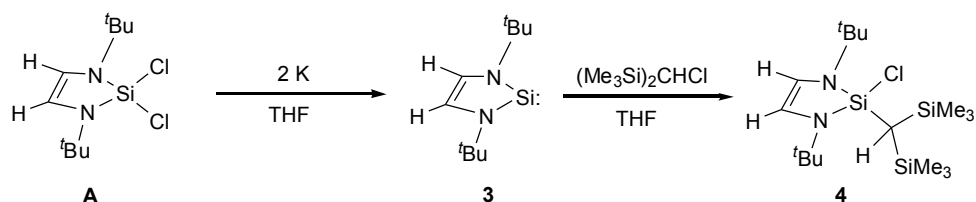

**Generation and NMR measurement of 2-silaimidazolium cation 5.** In a 5 mm NMR tube connectable to a vacuum line, chlorosilane **4** (46 mg, 0.118 mmol) and [Et<sub>3</sub>Si(benzene)]<sup>+</sup>•TPFPB<sup>-2</sup> (104 mg, 0.119 mmol) were placed, and the tube was connected to a vacuum line. Into this was added dry dichloromethane-*d*<sub>2</sub> (0.7 ml) by vacuum transfer. After being sealed, the tube was gently shaken so that the reactants were mixed well in a cold methanol bath at the temperature below -70 °C. The color of the solution turned to intense yellow, and then NMR spectra were recorded at low temperatures (-60 ~ -10 °C). A similar method was applied to the reaction in toluene-*d*<sub>8</sub> as a solvent. The resulting toluene-*d*<sub>8</sub> solution in a sealed NMR tube separated into two layers. The NMR tube was adjusted so that the lower layer part was positioned in the center of the probe, and the NMR measurement was conducted. Due to the high viscosity of the lower layer at lower temperatures, <sup>1</sup>H and <sup>13</sup>C NMR signals were too much broadened to give reliable information. The <sup>29</sup>Si NMR spectrum was also slightly broadened, but afforded reliable signals as shown in

(S2)

Figure 2 of the main text. The assignment of the NMR signals of **5** was made on the basis of the spectra obtained by C–H COSY and  $^{13}\text{C}$  DEPT techniques.

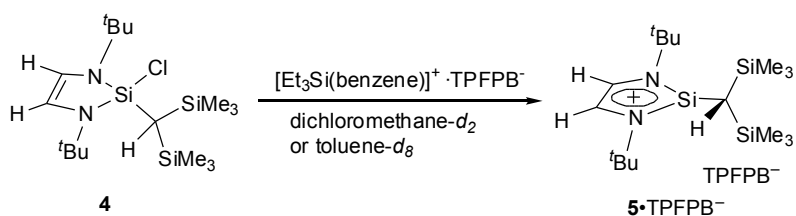

**Reaction of 2-silaimidazolium cation 5 with  $n\text{-Bu}_4\text{NBr}$ :** In a Schlenk tube equipped with a magnetic stirring bar and a rubber septum, chlorosilane **4** (151 mg, 0.387 mmol) and  $[\text{Et}_3\text{Si}(\text{benzene})]^+\cdot\text{TPFPB}^-$  (342 mg, 0.390 mmol) were placed, and dry dichloromethane (5 ml) was added with cooling at  $-50\text{ }^\circ\text{C}$ . During 2 h when the mixture was stirred at  $-50\text{ }^\circ\text{C}$ , the solution turned to intense yellow in color, indicating the formation of cation **5**. Then, a solution of  $n\text{-Bu}_4\text{NBr}$  (189 mg, 0.586 mmol) in dichloromethane (5 ml), which had been cooled at  $-50\text{ }^\circ\text{C}$ , was added using a cannula and the reaction mixture was stirred overnight. After the solvent was exchanged to hexane as described above and insoluble materials were removed by filtration, the filtrate was evaporated under reduced pressure to give a mixture containing bromosilane **6** as pale orange-red semisolid. Since isolation of **6** was not possible by any means including flash chromatography, preparative HPLC, and recrystallization, yield of **6** was determined by  $^1\text{H}$  NMR spectroscopy on the crude product mixture using a known quantity of hexamethylbenzene as an internal standard. Fluorosilane **B** is only detected by MS spectroscopy.

**6:**  $^1\text{H}$  NMR (313 K,  $\text{CD}_2\text{Cl}_2$ )  $\delta$  0.25 (brs, 18 H), 0.65 (s, 1 H), 1.41 (s, 18 H), 5.83 (s, 2 H);  $^{13}\text{C}$  NMR (313 K,  $\text{CD}_2\text{Cl}_2$ )  $\delta$  3.1 ( $\text{SiMe}_3$ ), 15.4 ( $>\text{CH}-$ ), 31.1 ( $\text{CH}_3$ ), 52.8 ( $>\text{C}<$ ), 112.4 ( $=\text{CH}-$ );  $^{29}\text{Si}$  NMR (313 K,  $\text{CD}_2\text{Cl}_2$ )  $\delta$  -24.2 ( $\text{SiBr}$ ) 0.4 ( $\text{SiMe}_3$ ); MS (EI, 70 eV)  $m/z$  (%) 434 ( $\text{M}^+$ , 90), 322 (100), 73 (98); HRMS  $m/z$  calcd for  $\text{C}_{17}\text{H}_{39}\text{N}_2^{79}\text{BrSi}_3$  434.1604, found 434.1599, calcd for  $\text{C}_{17}\text{H}_{39}\text{N}_2^{81}\text{BrSi}_3$  436.1584, found 436.1598.

**B:** MS (EI, 70 eV)  $m/z$  (%) 374 ( $\text{M}^+$ , 100), 262 (85), 73 (45); HRMS calcd for  $\text{C}_{17}\text{H}_{39}\text{N}_2\text{FSi}_3$  374.2405, found 374.2399.

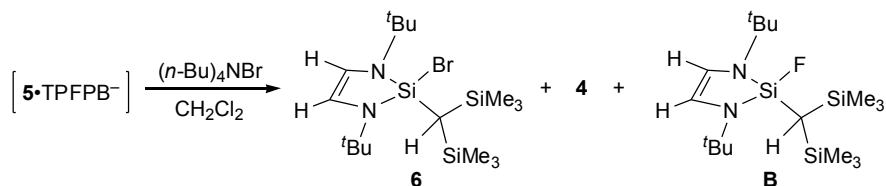

(S3)

## 2. NMR spectra

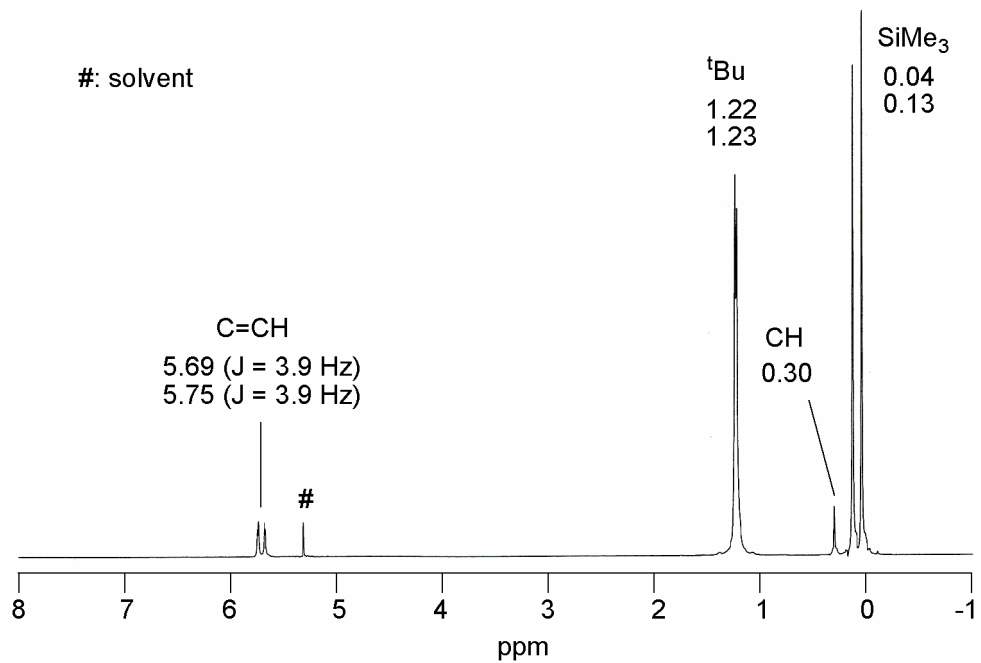

**Figure S1.** <sup>1</sup>H NMR spectrum of **4** in CD<sub>2</sub>Cl<sub>2</sub> at -90 °C (# = CH<sub>2</sub>Cl<sub>2</sub> in solvent).

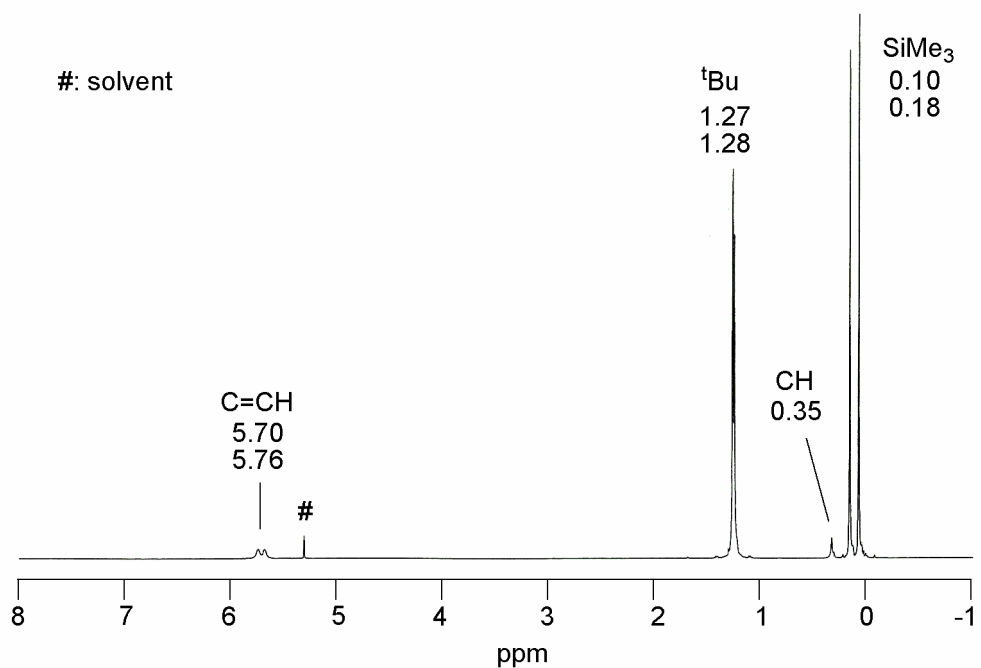

**Figure S2.** <sup>1</sup>H NMR spectrum of **4** in CD<sub>2</sub>Cl<sub>2</sub> at -60 °C.

(S4)

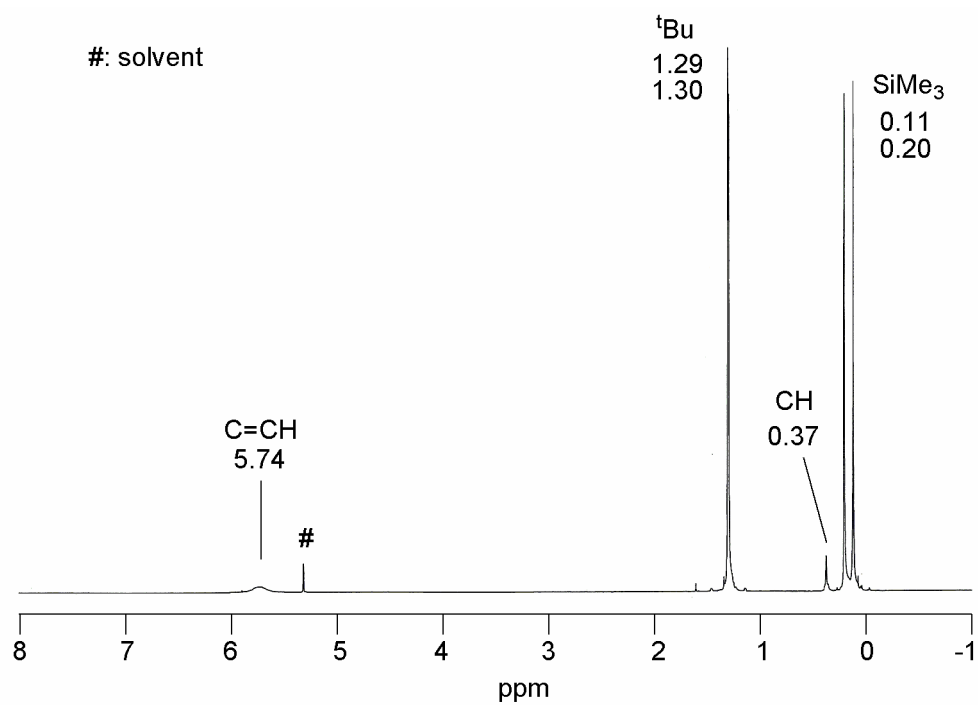

**Figure S3.** <sup>1</sup>H NMR spectrum of **4** in CD<sub>2</sub>Cl<sub>2</sub> at -20 °C.

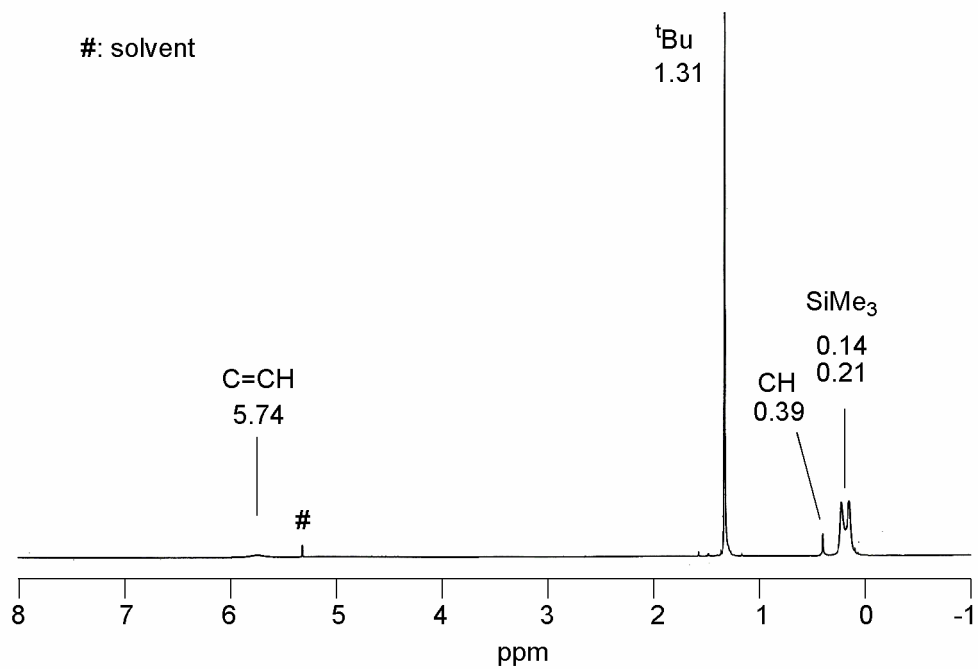

**Figure S4.** <sup>1</sup>H NMR spectrum of **4** in CD<sub>2</sub>Cl<sub>2</sub> at 0 °C.

(S5)

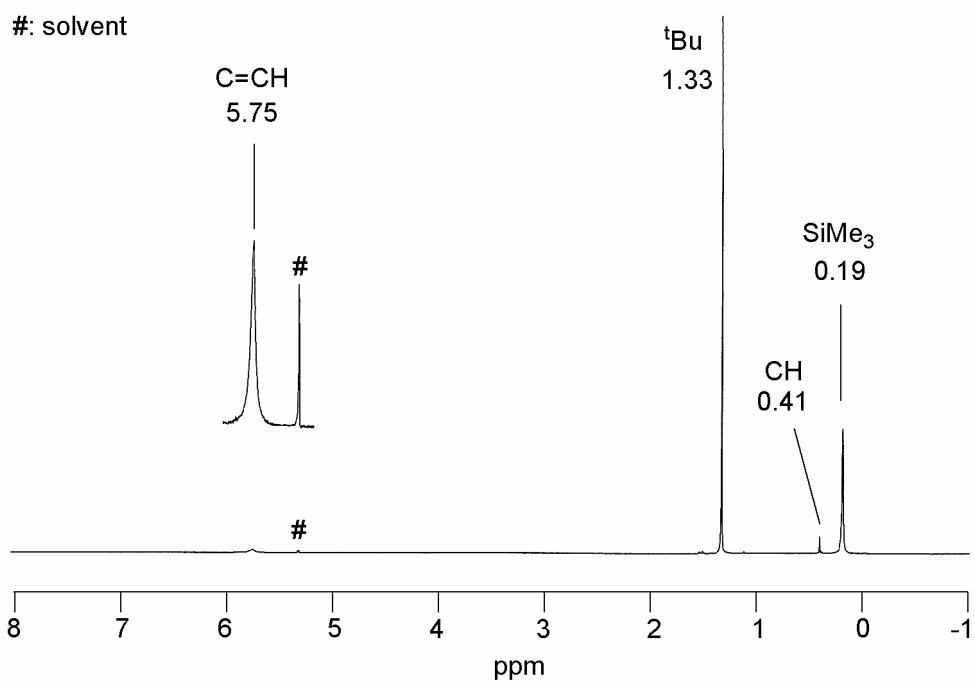

Figure S5. <sup>1</sup>H NMR spectrum of **4** in CD<sub>2</sub>Cl<sub>2</sub> at 25 °C.

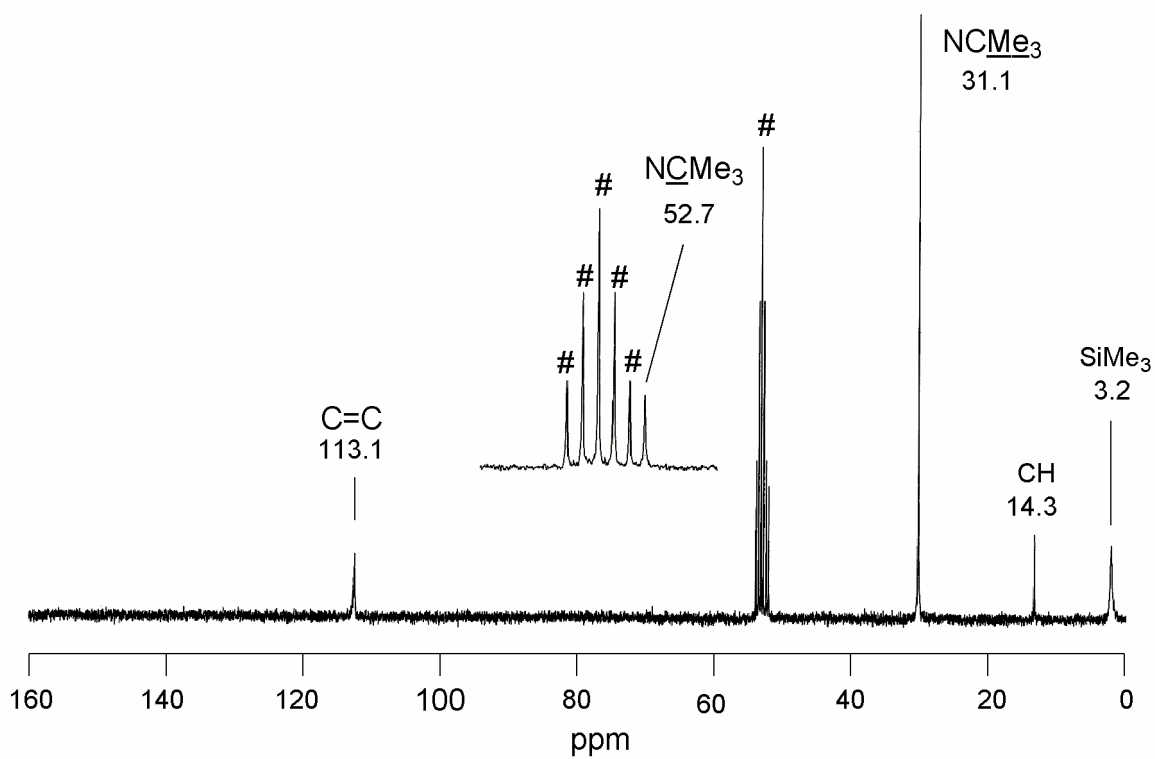

Figure S6. <sup>13</sup>C NMR spectrum of **4** in CD<sub>2</sub>Cl<sub>2</sub> at 25 °C.

(S6)

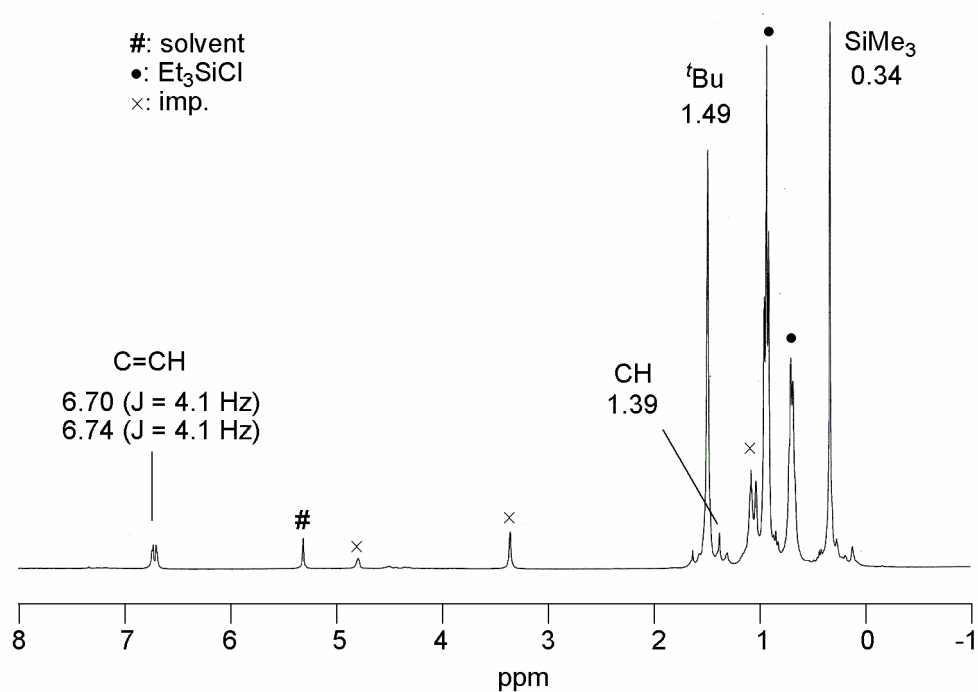

**Figure S7.** <sup>1</sup>H NMR spectrum of cation **5** in CD<sub>2</sub>Cl<sub>2</sub> at -60 °C.

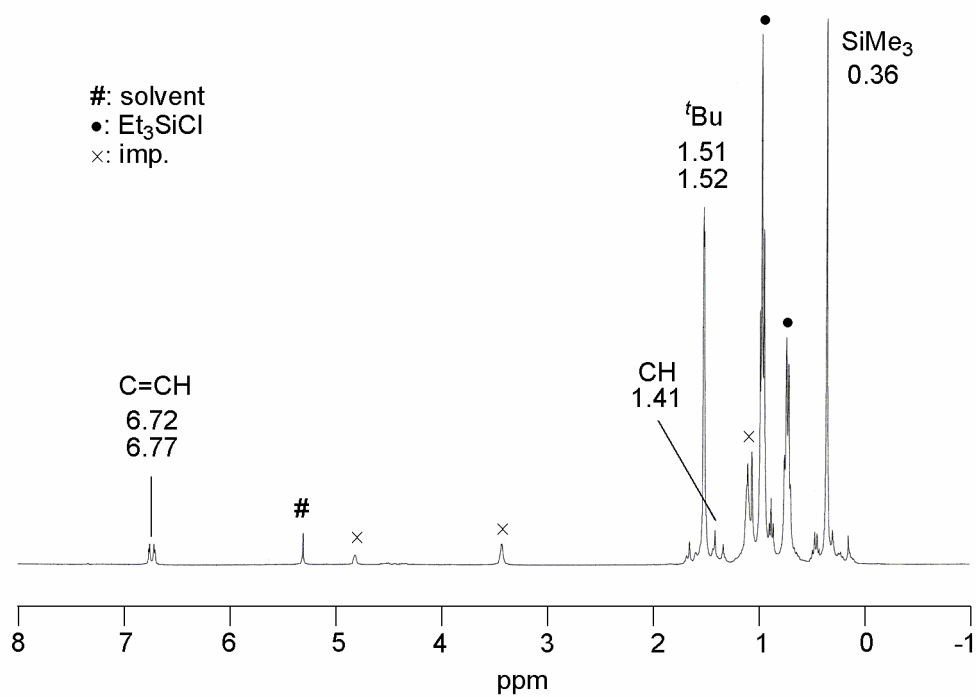

**Figure S8.** <sup>1</sup>H NMR spectrum of cation **5** in CD<sub>2</sub>Cl<sub>2</sub> at -30 °C.

(S7)

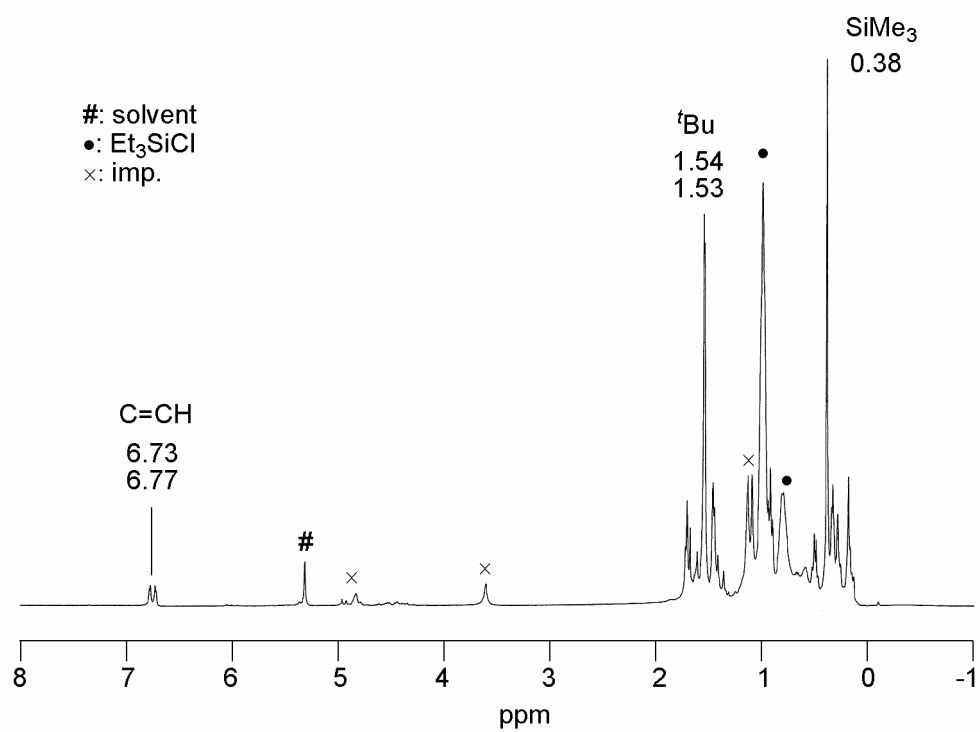

**Figure S9.** <sup>1</sup>H NMR spectrum of cation **5** in CD<sub>2</sub>Cl<sub>2</sub> at -10 °C.

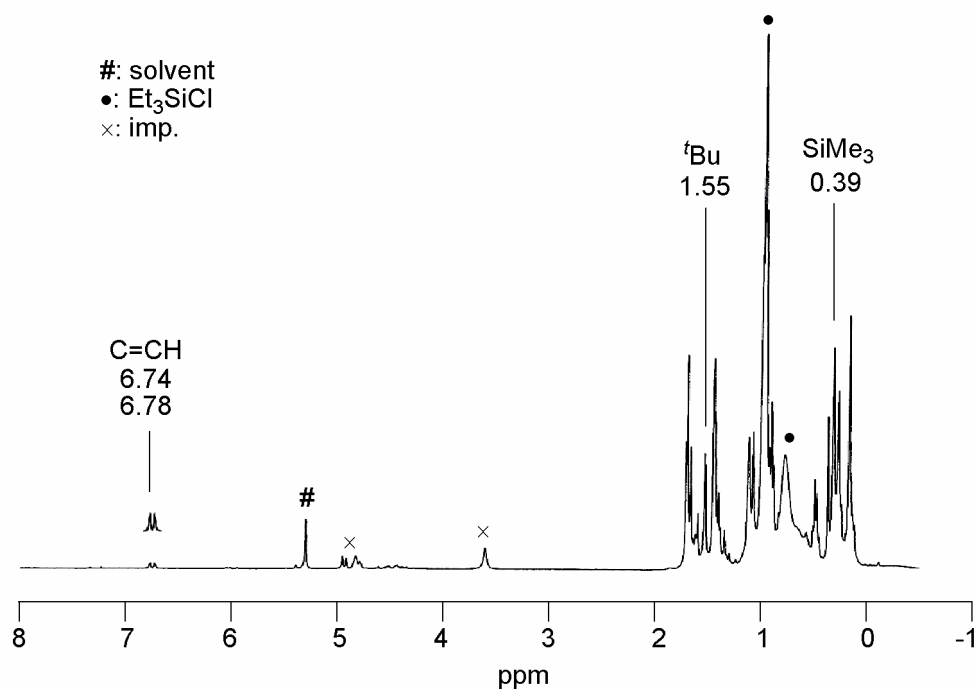

**Figure S10.** <sup>1</sup>H NMR spectrum of cation **5** in CD<sub>2</sub>Cl<sub>2</sub> at 0 °C.

(S8)



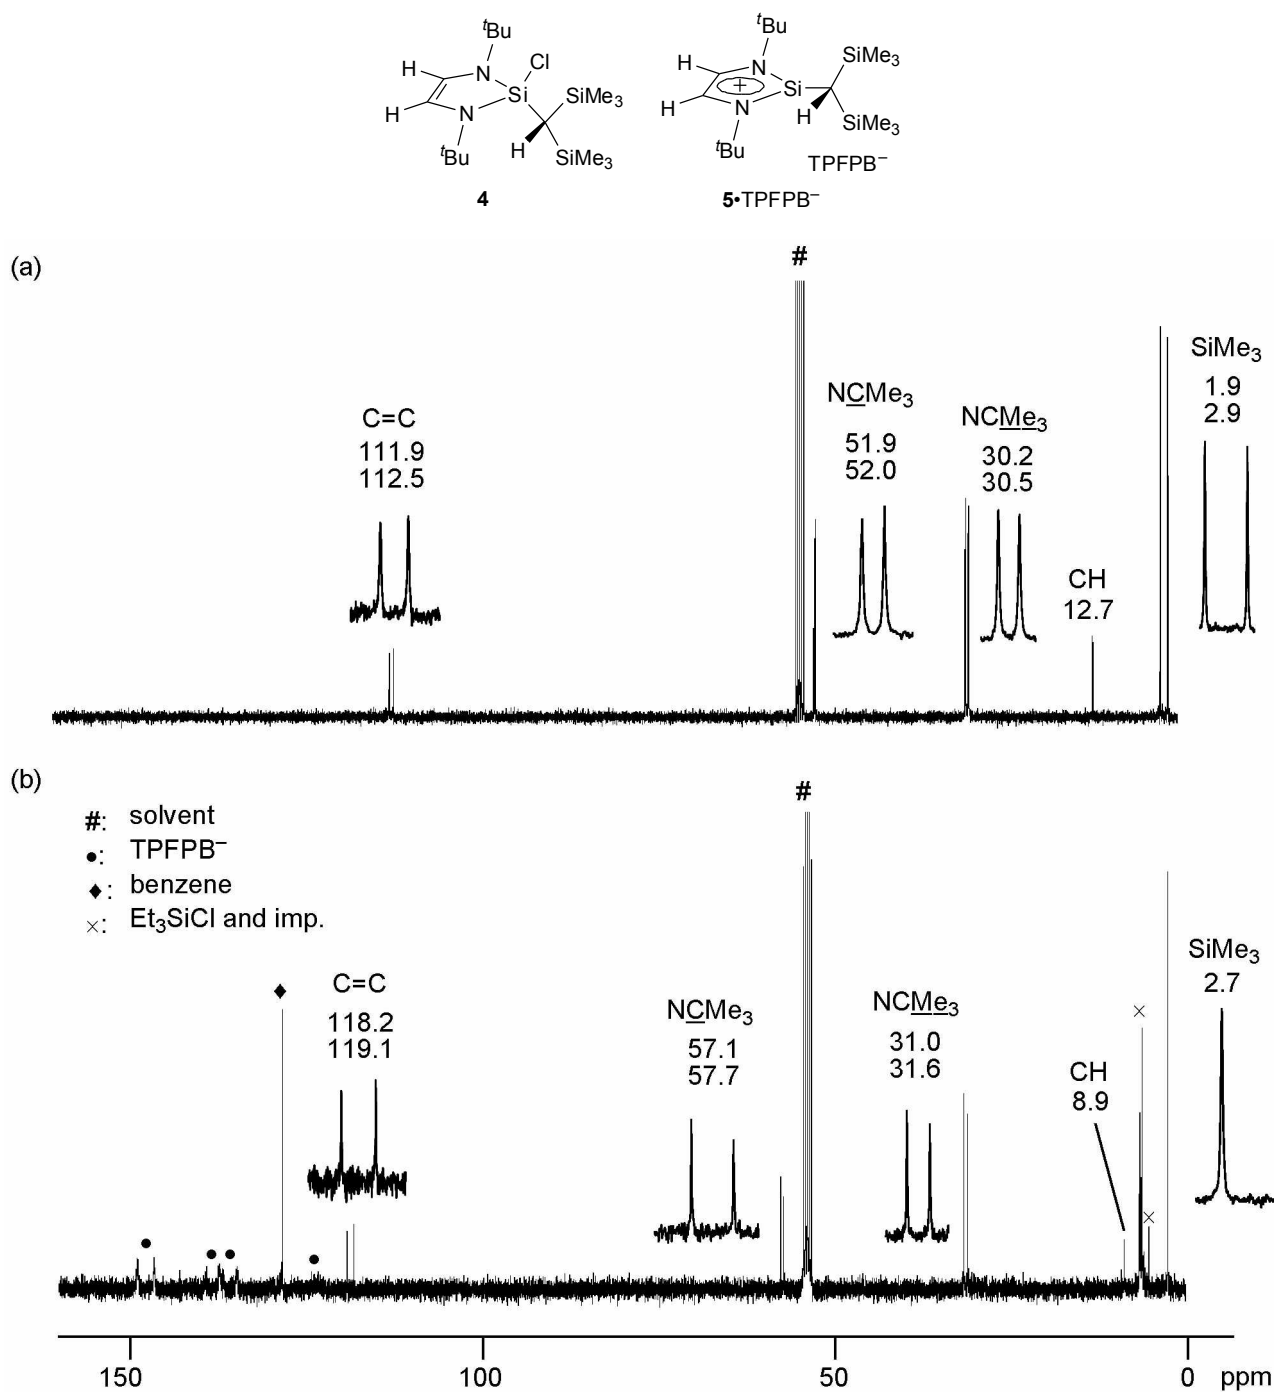

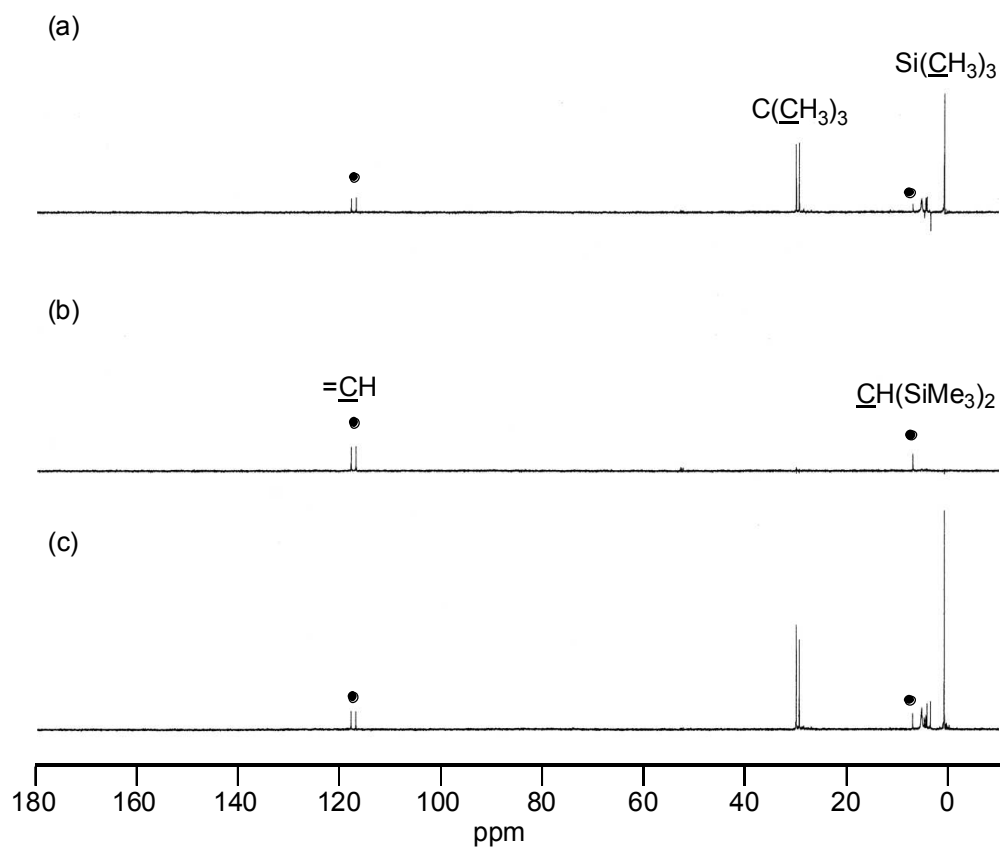

**Figure S12.**  $^{13}\text{C}$  NMR DEPT spectra of **5** in  $\text{CD}_2\text{Cl}_2$  at  $-60\text{ }^\circ\text{C}$ . (a) DEPT135, (b) DEPT90, and (c) DEPT45.

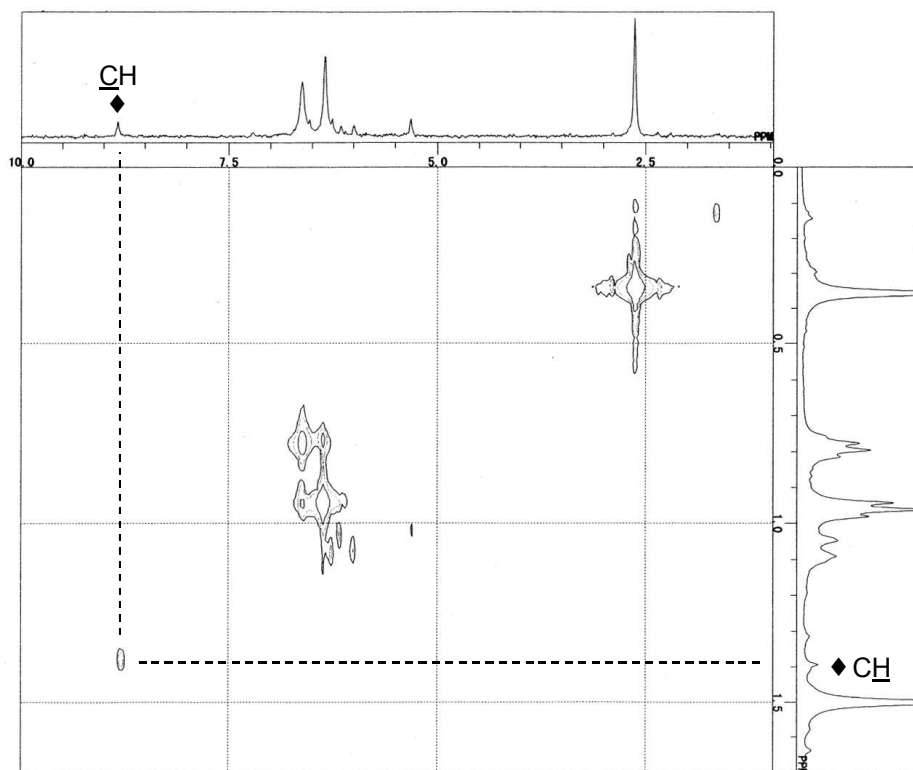

**Figure S13.**  $^{13}\text{C}$ - $^1\text{H}$  COSY spectrum of **5** in  $\text{CD}_2\text{Cl}_2$  at  $-60\text{ }^\circ\text{C}$ .

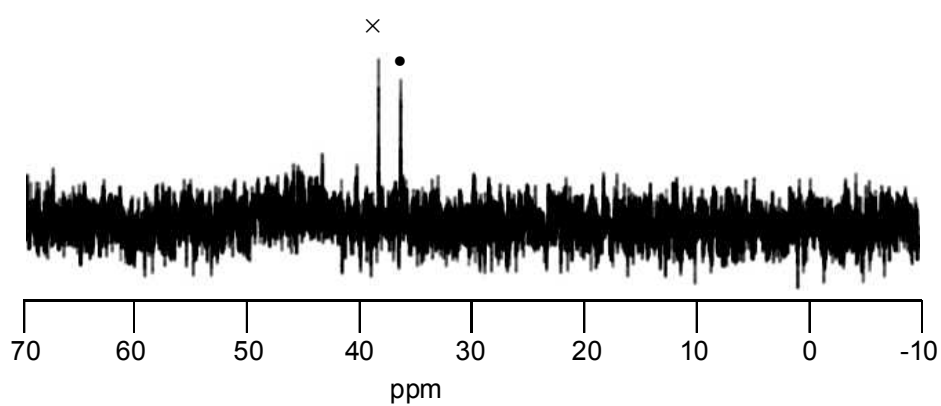

**Figure S14.**  $^{29}\text{Si}$  NMR spectrum of chlorotriethylsilane and  $[\text{Et}_3\text{Si}(\text{benzene})]^+\cdot\text{TPFPB}^-$  in  $\text{CD}_2\text{Cl}_2$  at  $-60\text{ }^\circ\text{C}$ .  $\times$  = chlorotriethylsilane,  $\bullet$  = unidentified compound.

(S11)

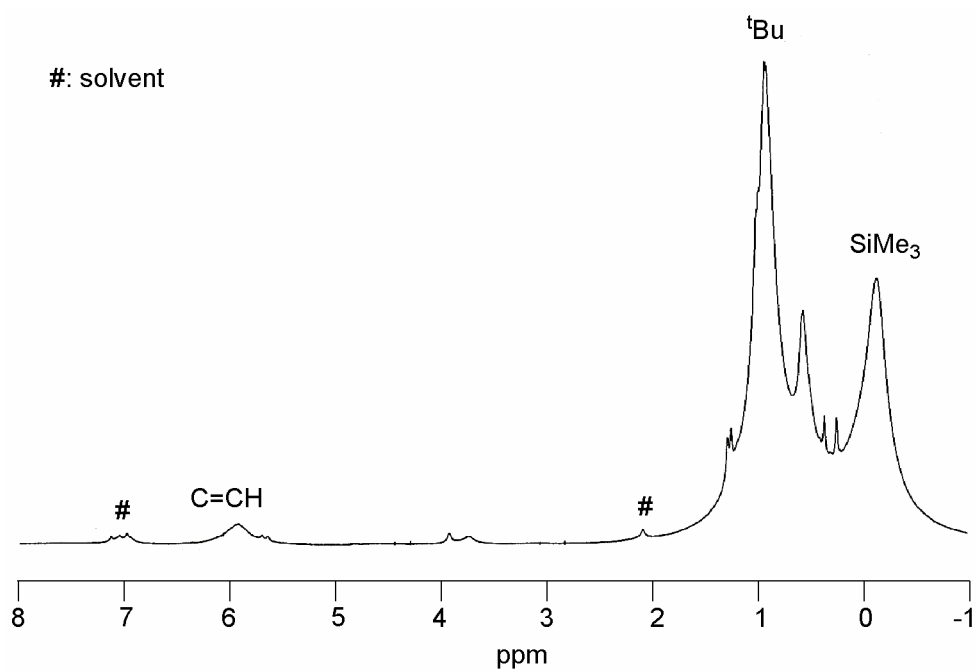

Figure S15.  $^1\text{H}$  NMR spectrum of cation **5** in toluene- $d_8$  ( $\text{C}_7\text{D}_8$ ) at  $-60^\circ\text{C}$ .

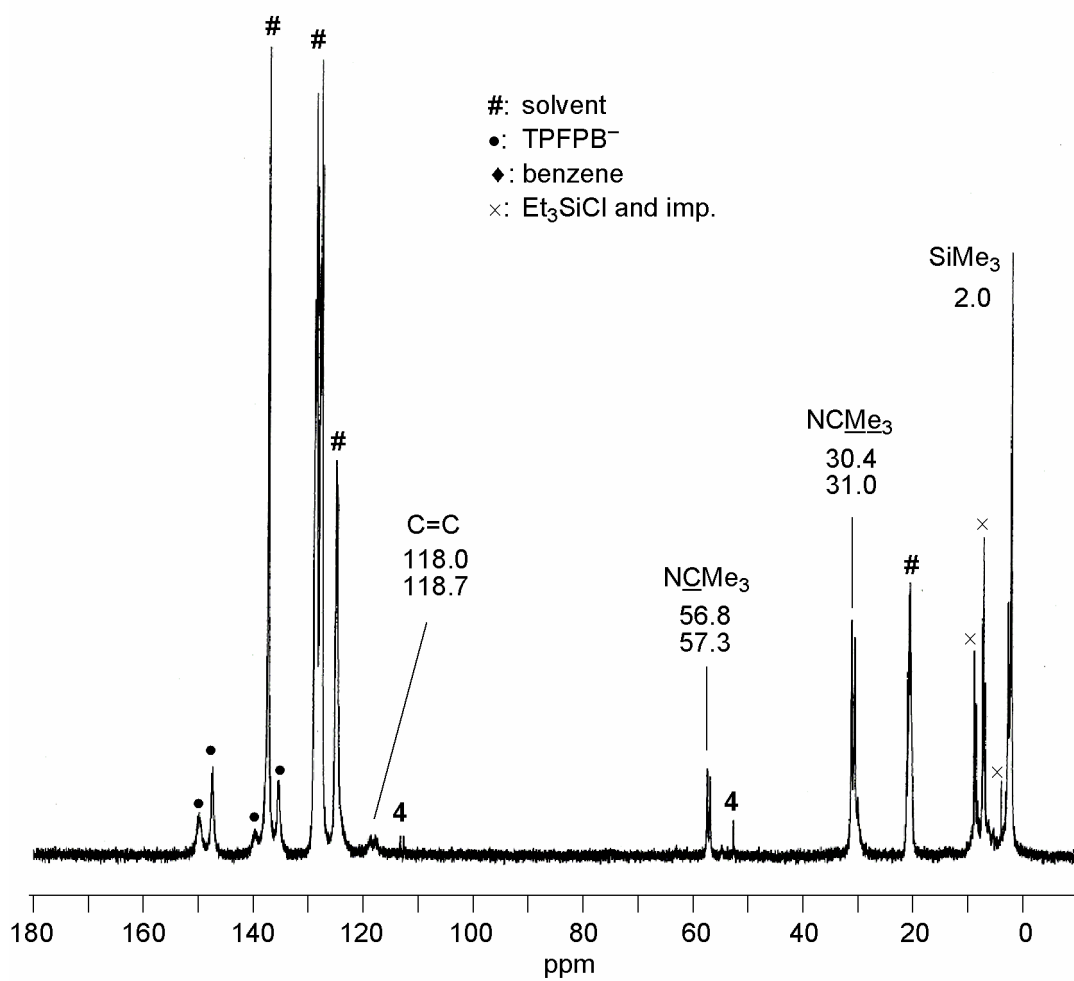

Figure S16.  $^{13}\text{C}$  NMR spectrum of cation **5** in  $\text{C}_7\text{D}_8$  at  $-60^\circ\text{C}$ .

(S12)

### 3. Theoretical studies

All calculations were conducted using Gaussian 98 programs<sup>2</sup> and the representations of the molecular structures were generated with the MOLEKEL program<sup>3</sup>. The geometries were optimized at the B3LYP/6-31G(d) level for **5** and at the B3LYP/6-31+G(d,p) level for **7–14** and no imaginary frequency numbers were found in all the optimized structures. The GIAO calculation of **5** was carried at the B3LYP/6-311+G(2df,p) level and a tetramethylsilane ( $C_s$  symmetry) calculated at the same level was used as a reference. The NICS values were obtained at the GIAO/B3LYP/6-311+G(2df,p) level and the cartesian coordinates of ghost atoms were given in tables. The ghost atoms for NICS calculations of **7** and **8** were positioned at the center of the five-membered ring for NICS(0) and at 1 Å above the center of the five-membered ring for NICS(1). Total energies of **7–14** for homodesmotic reaction were estimated by the MP2/6-31G+(d,p) method with zero-point energy correction.

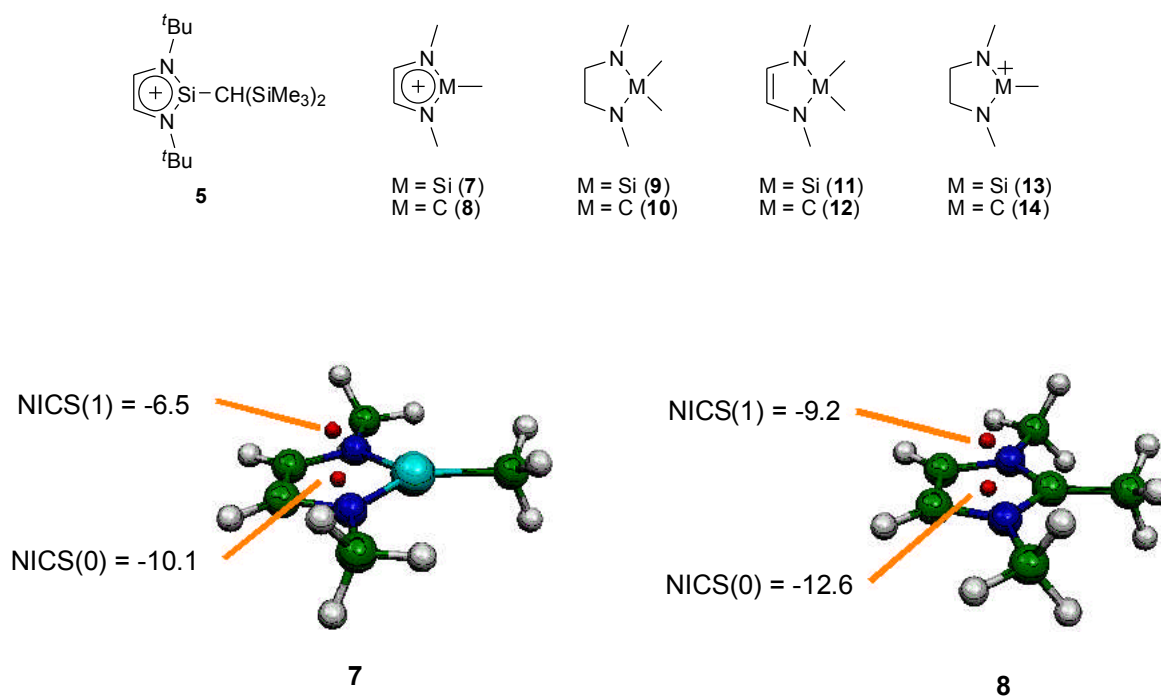

Figure S17. Optimized structures of **7** and **8** with NICS(0) and NICS(1) values (ppm).

Table S1. Total Energies of benzene, **5**, and **7–14** calculated at the B3LYP/6-31+G(d,p)+ZPE level

| Compound  | Energy (hartree) | Compound  | Energy (hartree) |
|-----------|------------------|-----------|------------------|
| benzene   | -232.167969      | <b>5</b>  | -1648.661478     |
| <b>7</b>  | -595.806835      | <b>8</b>  | -344.409933      |
| <b>9</b>  | -637.138497      | <b>10</b> | -385.664251      |
| <b>11</b> | -635.942092      | <b>12</b> | -384.462434      |
| <b>13</b> | -596.998372      | <b>14</b> | -345.593767      |

(S13)

**Table S1 .** Total Energies of **7–14** for Homodesmic Reaction calculated at the MP2/6-31+G(d,p)+ZPE level

| Compound  | Energy (hartree) | Compound  | Energy (hartree) |
|-----------|------------------|-----------|------------------|
| <b>7</b>  | −594.345605      | <b>8</b>  | −343.336646      |
| <b>9</b>  | −635.505207      | <b>10</b> | −384.23260       |
| <b>11</b> | −634.325598      | <b>12</b> | −383.239306      |
| <b>13</b> | −595.516284      | <b>14</b> | −344.493063      |

**Table S2.** Cartesian Coordinates for the Optimized Structure of **5**

| Center Number | Atomic Number | Atomic Type | Coordinates (Angstroms) |           |           |
|---------------|---------------|-------------|-------------------------|-----------|-----------|
|               |               |             | X                       | Y         | Z         |
| 1             | 6             | 0           | 2.665100                | 1.644999  | 0.100002  |
| 2             | 6             | 0           | 3.171544                | 0.395282  | 0.069758  |
| 3             | 7             | 0           | 1.266470                | 1.724958  | 0.011965  |
| 4             | 7             | 0           | 2.219905                | -0.630834 | -0.035569 |
| 5             | 6             | 0           | 2.721269                | -2.052716 | -0.136018 |
| 6             | 14            | 0           | 0.669302                | 0.115696  | -0.082491 |
| 7             | 6             | 0           | 1.549787                | -3.031162 | -0.277326 |
| 8             | 6             | 0           | 0.621901                | 3.088749  | 0.024910  |
| 9             | 6             | 0           | 1.304208                | 3.989710  | -1.022380 |
| 10            | 6             | 0           | 0.769342                | 3.682791  | 1.436901  |
| 11            | 6             | 0           | -0.981582               | -0.672768 | -0.031665 |
| 12            | 6             | 0           | -0.856969               | 2.951269  | -0.342073 |
| 13            | 6             | 0           | 3.504460                | -2.390273 | 1.146587  |
| 14            | 6             | 0           | 3.618932                | -2.171730 | -1.382311 |
| 15            | 14            | 0           | -1.838510               | -0.694401 | 1.729957  |
| 16            | 14            | 0           | -2.092738               | -0.521053 | -1.640200 |
| 17            | 6             | 0           | -2.686594               | -2.271731 | -2.024507 |
| 18            | 6             | 0           | -1.030757               | 0.066877  | -3.093529 |
| 19            | 6             | 0           | -3.576766               | 0.615942  | -1.392160 |
| 20            | 6             | 0           | -3.163517               | -2.036652 | 1.671266  |
| 21            | 6             | 0           | -2.614584               | 0.945061  | 2.248258  |
| 22            | 6             | 0           | -0.516447               | -1.167808 | 2.999007  |
| 23            | 1             | 0           | 3.252706                | 2.547246  | 0.171660  |
| 24            | 1             | 0           | 4.223463                | 0.156629  | 0.108704  |
| 25            | 1             | 0           | 1.946093                | -4.045867 | -0.374208 |
| 26            | 1             | 0           | 0.955366                | -2.831948 | -1.176265 |
| 27            | 1             | 0           | 0.899936                | -3.024279 | 0.603989  |
| 28            | 1             | 0           | 0.759838                | 4.936745  | -1.088924 |
| 29            | 1             | 0           | 1.293303                | 3.519474  | -2.011114 |
| 30            | 1             | 0           | 2.339223                | 4.231545  | -0.765747 |
| 31            | 1             | 0           | 0.330289                | 4.684946  | 1.468191  |
| 32            | 1             | 0           | 1.820453                | 3.768862  | 1.729675  |
| 33            | 1             | 0           | 0.259038                | 3.061947  | 2.181044  |
| 34            | 1             | 0           | -0.677674               | -1.727928 | -0.101329 |
| 35            | 1             | 0           | -1.344104               | 3.927844  | -0.264456 |
| 36            | 1             | 0           | -1.385186               | 2.272649  | 0.331099  |
| 37            | 1             | 0           | -0.979423               | 2.604541  | -1.372537 |
| 38            | 1             | 0           | 3.860601                | -3.424073 | 1.098603  |
| 39            | 1             | 0           | 2.867702                | -2.287059 | 2.031312  |
| 40            | 1             | 0           | 4.379261                | -1.747363 | 1.278114  |
| 41            | 1             | 0           | 3.974201                | -3.202100 | -1.481498 |
| 42            | 1             | 0           | 4.499262                | -1.525438 | -1.324350 |
| 43            | 1             | 0           | 3.063378                | -1.911988 | -2.289631 |
| 44            | 1             | 0           | -3.288889               | -2.262607 | -2.941123 |
| 45            | 1             | 0           | -3.310542               | -2.692031 | -1.229180 |
| 46            | 1             | 0           | -1.850752               | -2.961310 | -2.194931 |
| 47            | 1             | 0           | -1.642437               | 0.081520  | -4.004276 |
| 48            | 1             | 0           | -0.191818               | -0.613492 | -3.288363 |
| 49            | 1             | 0           | -0.621509               | 1.075868  | -2.970361 |
| 50            | 1             | 0           | -4.161284               | 0.641893  | -2.320207 |
| 51            | 1             | 0           | -3.303430               | 1.647992  | -1.152048 |
| 52            | 1             | 0           | -4.244346               | 0.250805  | -0.603808 |
| 53            | 1             | 0           | -3.585050               | -2.171305 | 2.675000  |
| 54            | 1             | 0           | -2.762382               | -3.006233 | 1.354720  |
| 55            | 1             | 0           | -3.994095               | -1.781155 | 1.004429  |
| 56            | 1             | 0           | -3.180795               | 0.771242  | 3.172219  |
| 57            | 1             | 0           | -3.316914               | 1.346868  | 1.511158  |
| 58            | 1             | 0           | -1.873710               | 1.719342  | 2.475208  |
| 59            | 1             | 0           | -0.975668               | -1.255272 | 3.991447  |
| 60            | 1             | 0           | 0.281377                | -0.419008 | 3.084898  |
| 61            | 1             | 0           | -0.048834               | -2.134791 | 2.778070  |

**Table S3.** Cartesian Coordinates for the Optimized Structure of **7**

| Center Number | Atomic Number | Atomic Type | Coordinates (Angstroms) |           |           |
|---------------|---------------|-------------|-------------------------|-----------|-----------|
|               |               |             | X                       | Y         | Z         |
| 1             | 14            | 0           | -0.064546               | 0.770154  | -0.047384 |
| 2             | 7             | 0           | -1.223606               | -0.469101 | 0.011143  |
| 3             | 6             | 0           | -0.542251               | -1.694476 | 0.038987  |
| 4             | 6             | 0           | 0.811332                | -1.583036 | 0.026672  |
| 5             | 7             | 0           | 1.282490                | -0.262732 | -0.011657 |
| 6             | 6             | 0           | -0.215214               | 2.611975  | -0.024882 |
| 7             | 6             | 0           | -2.695928               | -0.433246 | 0.019632  |
| 8             | 6             | 0           | 2.729090                | 0.013050  | -0.029962 |
| 9             | 1             | 0           | -0.281295               | 2.987810  | 1.000532  |
| 10            | 1             | 0           | 0.657229                | 3.057794  | -0.512035 |
| 11            | 1             | 0           | -1.109714               | 2.917544  | -0.575867 |
| 12            | 1             | 0           | -3.087196               | -0.958839 | -0.854923 |
| 13            | 1             | 0           | -3.072998               | -0.904932 | 0.930433  |
| 14            | 1             | 0           | -3.043312               | 0.600530  | -0.007745 |
| 15            | 1             | 0           | 3.184913                | -0.443163 | -0.912153 |
| 16            | 1             | 0           | 3.194598                | -0.389109 | 0.873253  |
| 17            | 1             | 0           | 2.902529                | 1.089594  | -0.062394 |
| 18            | 1             | 0           | -1.105289               | -2.617780 | 0.059277  |
| 19            | 1             | 0           | 1.518084                | -2.401775 | 0.035399  |
| 20            | 0             | 0           | 0.084624                | -0.660722 | -0.004249 |
| 21            | 0             | 0           | 0.101046                | -0.628883 | 0.995110  |

**Table S4.** Cartesian Coordinates for the Optimized Structure of **8**

| Center Number | Atomic Number | Atomic Type | Coordinates (Angstroms) |           |           |
|---------------|---------------|-------------|-------------------------|-----------|-----------|
|               |               |             | X                       | Y         | Z         |
| 1             | 6             | 0           | 0.336746                | 0.511348  | 0.004955  |
| 2             | 7             | 0           | -1.004585               | 0.372974  | -0.019322 |
| 3             | 7             | 0           | -1.323232               | -0.974163 | -0.034786 |
| 4             | 6             | 0           | -0.149595               | -1.662786 | -0.016675 |
| 5             | 6             | 0           | 0.870481                | -0.727206 | 0.009582  |
| 6             | 6             | 0           | 1.088954                | 1.794594  | 0.052098  |
| 7             | 6             | 0           | -1.978716               | 1.474649  | -0.032276 |
| 8             | 6             | 0           | 2.307248                | -1.040104 | 0.033793  |
| 9             | 1             | 0           | 1.259652                | 2.112723  | 1.087838  |
| 10            | 1             | 0           | 2.061065                | 1.693320  | -0.434575 |
| 11            | 1             | 0           | 0.537777                | 2.587095  | -0.458049 |
| 12            | 1             | 0           | -1.898868               | 2.037731  | -0.964562 |
| 13            | 1             | 0           | -2.977424               | 1.046401  | 0.040826  |
| 14            | 1             | 0           | -1.811202               | 2.133826  | 0.821054  |
| 15            | 1             | 0           | 2.781151                | -0.708240 | -0.892425 |
| 16            | 1             | 0           | 2.418708                | -2.119723 | 0.124019  |
| 17            | 1             | 0           | 2.781337                | -0.560801 | 0.891843  |
| 18            | 1             | 0           | -2.344000               | -1.321262 | -0.057319 |
| 19            | 1             | 0           | 0.045630                | -2.723363 | -0.020167 |
| 20            | 0             | 0           | -0.266579               | -0.537068 | -0.013240 |
| 21            | 0             | 0           | -0.283914               | -0.544443 | 0.986583  |



**Table S5.** Cartesian Coordinates for the Optimized Structure of **9**

| Center Number | Atomic Number | Atomic Type | Coordinates (Angstroms) |           |           |
|---------------|---------------|-------------|-------------------------|-----------|-----------|
|               |               |             | X                       | Y         | Z         |
| 1             | 14            | 0           | 0.000000                | 0.693265  | 0.000001  |
| 2             | 7             | 0           | -1.249554               | -0.508165 | -0.251241 |
| 3             | 7             | 0           | 1.249556                | -0.508163 | 0.251239  |
| 4             | 6             | 0           | -0.235805               | 1.807043  | 1.507690  |
| 5             | 6             | 0           | 0.235801                | 1.807049  | -1.507685 |
| 6             | 6             | 0           | -2.677793               | -0.305933 | -0.102848 |
| 7             | 6             | 0           | 2.677794                | -0.305929 | 0.102843  |
| 8             | 6             | 0           | -0.757827               | -1.835256 | 0.123856  |
| 9             | 6             | 0           | 0.757830                | -1.835256 | -0.123854 |
| 10            | 1             | 0           | -0.418451               | 1.212822  | 2.409064  |
| 11            | 1             | 0           | -1.077742               | 2.496998  | 1.372059  |
| 12            | 1             | 0           | 0.657191                | 2.419324  | 1.685491  |
| 13            | 1             | 0           | -0.657200               | 2.419321  | -1.685490 |
| 14            | 1             | 0           | 0.418458                | 1.212832  | -2.409060 |
| 15            | 1             | 0           | 1.077730                | 2.497011  | -1.372049 |
| 16            | 1             | 0           | -3.026971               | -0.439601 | 0.937204  |
| 17            | 1             | 0           | -2.956394               | 0.704158  | -0.421539 |
| 18            | 1             | 0           | -3.239121               | -1.011756 | -0.731738 |
| 19            | 1             | 0           | 3.026969                | -0.439596 | -0.937210 |
| 20            | 1             | 0           | 2.956394                | 0.704163  | 0.421533  |
| 21            | 1             | 0           | 3.239125                | -1.011751 | 0.731731  |
| 22            | 1             | 0           | -0.967003               | -2.057660 | 1.187163  |
| 23            | 1             | 0           | -1.249660               | -2.615164 | -0.475237 |
| 24            | 1             | 0           | 0.967006                | -2.057663 | -1.187160 |
| 25            | 1             | 0           | 1.249664                | -2.615161 | 0.475241  |

**Table S6.** Cartesian Coordinates for the Optimized Structure of **10**

| Center Number | Atomic Number | Atomic Type | Coordinates (Angstroms) |           |            |
|---------------|---------------|-------------|-------------------------|-----------|------------|
|               |               |             | X                       | Y         | Z          |
| 1             | 6             | 0           | 0.000004                | -0.594567 | 0.000016   |
| 2             | 7             | 0           | -1.103827               | 0.338810  | 0.356210   |
| 3             | 7             | 0           | 1.103801                | 0.338824  | -0.356239  |
| 4             | 6             | 0           | -0.287181               | -1.479115 | -1.230440  |
| 5             | 6             | 0           | 0.287222                | -1.479017 | 1.230536   |
| 6             | 6             | 0           | -2.467945               | -0.071607 | 0.085742   |
| 7             | 6             | 0           | 2.467938                | -0.071582 | -0.085845  |
| 8             | 6             | 0           | -0.753770               | 1.677903  | -0.100939  |
| 9             | 6             | 0           | 0.753748                | 1.677901  | 0.100958   |
| 10            | 1             | 0           | -0.594761               | -0.865571 | -2.081732  |
| 11            | 1             | 0           | -1.061925               | -2.226571 | -1.027066  |
| 12            | 1             | 0           | 0.623402                | -2.014929 | -1.517880  |
| 13            | 1             | 0           | -0.623343               | -2.014842 | 1.518014   |
| 14            | 1             | 0           | 0.594777                | -0.865399 | 2.081785   |
| 15            | 1             | 0           | 1.061995                | -2.226459 | 1.027220   |
| 16            | 1             | 0           | -2.724054               | -0.102201 | -0.989486  |
| 17            | 1             | 0           | -2.661269               | -1.061102 | 0.511592   |
| 18            | 1             | 0           | -3.152310               | 0.632290  | 0.571974   |
| 19            | 1             | 0           | 2.724107                | -0.102165 | 0.989368   |
| 20            | 1             | 0           | 2.661242                | -1.061080 | -0.511697  |
| 21            | 1             | 0           | 3.152271                | 0.632314  | -0.572124  |
| 22            | 1             | 0           | -1.000568               | 1.850925  | -1.166209  |
| 23            | 1             | 0           | -1.271339               | 2.435478  | 0.498769   |
| 24            | 1             | 0           | 1.000549                | 1.850888  | 1.166233   |
| 25            | 1             | 0           | 1.271316                | 2.435496  | -0.4987261 |

**Table S7.** Cartesian Coordinates for the Optimized Structure of **11**

| Center Number | Atomic Number | Atomic Type | Coordinates (Angstroms) |           |           |
|---------------|---------------|-------------|-------------------------|-----------|-----------|
|               |               |             | X                       | Y         | Z         |
| 1             | 14            | 0           | 0.000000                | 0.665921  | -0.003575 |
| 2             | 7             | 0           | -1.257297               | -0.562239 | -0.011440 |
| 3             | 7             | 0           | 1.257297                | -0.562238 | -0.011464 |
| 4             | 6             | 0           | 0.000013                | 1.775569  | 1.526352  |
| 5             | 6             | 0           | -0.000016               | 1.793740  | -1.519296 |
| 6             | 6             | 0           | -2.700455               | -0.424079 | 0.011164  |
| 7             | 6             | 0           | 2.700456                | -0.424076 | 0.011157  |
| 8             | 6             | 0           | -0.675554               | -1.849159 | -0.006239 |
| 9             | 6             | 0           | 0.675556                | -1.849158 | -0.006249 |
| 10            | 1             | 0           | 0.000028                | 1.176572  | 2.442619  |
| 11            | 1             | 0           | -0.882142               | 2.428156  | 1.543825  |
| 12            | 1             | 0           | 0.882160                | 2.428168  | 1.543802  |
| 13            | 1             | 0           | -0.882164               | 2.446493  | -1.528722 |
| 14            | 1             | 0           | -0.000024               | 1.205519  | -2.442412 |
| 15            | 1             | 0           | 0.882131                | 2.446495  | -1.528739 |
| 16            | 1             | 0           | -3.141159               | -0.856430 | 0.922004  |
| 17            | 1             | 0           | -2.978701               | 0.633985  | -0.017547 |
| 18            | 1             | 0           | -3.169854               | -0.910542 | -0.856528 |
| 19            | 1             | 0           | 3.169866                | -0.910590 | -0.856499 |
| 20            | 1             | 0           | 2.978702                | 0.633986  | -0.017615 |
| 21            | 1             | 0           | 3.141148                | -0.856373 | 0.922029  |
| 22            | 1             | 0           | -1.309371               | -2.727008 | -0.008581 |
| 23            | 1             | 0           | 1.309374                | -2.727007 | -0.008599 |

**Table S8.** Cartesian Coordinates for the Optimized Structure of **12**

| Center Number | Atomic Number | Atomic Type | Coordinates (Angstroms) |           |           |
|---------------|---------------|-------------|-------------------------|-----------|-----------|
|               |               |             | X                       | Y         | Z         |
| 1             | 6             | 0           | 0.000001                | -0.557284 | -0.089738 |
| 2             | 7             | 0           | 1.149504                | 0.366194  | -0.329854 |
| 3             | 7             | 0           | -1.149505               | 0.366192  | -0.329854 |
| 4             | 6             | 0           | 0.000002                | -1.118832 | 1.353848  |
| 5             | 6             | 0           | 0.000003                | -1.697005 | -1.114039 |
| 6             | 6             | 0           | 2.462553                | 0.014168  | 0.184517  |
| 7             | 6             | 0           | -2.462554               | 0.014165  | 0.184517  |
| 8             | 6             | 0           | 0.671372                | 1.675993  | -0.099266 |
| 9             | 6             | 0           | -0.671376               | 1.675992  | -0.099266 |
| 10            | 1             | 0           | 0.000005                | -0.307495 | 2.088686  |
| 11            | 1             | 0           | 0.880414                | -1.744626 | 1.525804  |
| 12            | 1             | 0           | -0.880413               | -1.744621 | 1.525808  |
| 13            | 1             | 0           | 0.883419                | -2.333015 | -0.989289 |
| 14            | 1             | 0           | 0.000004                | -1.282624 | -2.124234 |
| 15            | 1             | 0           | -0.883413               | -2.333016 | -0.989292 |
| 16            | 1             | 0           | 2.540792                | 0.052824  | 1.284228  |
| 17            | 1             | 0           | 2.739399                | -0.990146 | -0.149334 |
| 18            | 1             | 0           | 3.197969                | 0.709839  | -0.231694 |
| 19            | 1             | 0           | -2.739394               | -0.990154 | -0.149326 |
| 20            | 1             | 0           | -2.540795               | 0.052830  | 1.284227  |
| 21            | 1             | 0           | -3.197973               | 0.709828  | -0.231702 |
| 22            | 1             | 0           | 1.351966                | 2.515243  | -0.074680 |
| 23            | 1             | 0           | -1.351971               | 2.515241  | -0.074680 |

**Table S9.** Cartesian Coordinates for the Optimized Structure of **13**

| Center Number | Atomic Number | Atomic Type | Coordinates (Angstroms) |           |           |
|---------------|---------------|-------------|-------------------------|-----------|-----------|
|               |               |             | X                       | Y         | Z         |
| 1             | 14            | 0           | -0.001719               | 0.758217  | -0.000371 |
| 2             | 7             | 0           | 1.286210                | -0.299863 | 0.040046  |
| 3             | 7             | 0           | -1.283912               | -0.306635 | -0.041502 |
| 4             | 6             | 0           | -0.008276               | 2.600698  | 0.001242  |
| 5             | 6             | 0           | 2.737698                | -0.113389 | 0.022844  |
| 6             | 6             | 0           | -2.736056               | -0.124334 | -0.023561 |
| 7             | 6             | 0           | 0.772196                | -1.688501 | -0.120994 |
| 8             | 6             | 0           | -0.763684               | -1.692216 | 0.122494  |
| 9             | 1             | 0           | -0.552318               | 2.978137  | -0.870845 |
| 10            | 1             | 0           | 1.016456                | 2.981284  | -0.034129 |
| 11            | 1             | 0           | -0.494485               | 2.981505  | 0.905261  |
| 12            | 1             | 0           | 3.161772                | -0.494897 | -0.912619 |
| 13            | 1             | 0           | 3.194536                | -0.646536 | 0.862634  |
| 14            | 1             | 0           | 2.987018                | 0.945995  | 0.111064  |
| 15            | 1             | 0           | -3.158419               | -0.501644 | 0.914457  |
| 16            | 1             | 0           | -3.192423               | -0.663658 | -0.859688 |
| 17            | 1             | 0           | -2.988215               | 0.934003  | -0.117369 |
| 18            | 1             | 0           | 1.013783                | -2.036543 | -1.132465 |
| 19            | 1             | 0           | 1.273421                | -2.346405 | 0.595011  |
| 20            | 1             | 0           | -1.003263               | -2.040280 | 1.134461  |
| 21            | 1             | 0           | -1.261147               | -2.354076 | -0.592538 |

**Table S10.** Cartesian Coordinates for the Optimized Structure of **14**

| Center Number | Atomic Number | Atomic Type | Coordinates (Angstroms) |           |           |
|---------------|---------------|-------------|-------------------------|-----------|-----------|
|               |               |             | X                       | Y         | Z         |
| 1             | 6             | 0           | 0.010171                | 0.597074  | 0.000349  |
| 2             | 7             | 0           | 1.093221                | -0.177296 | 0.061435  |
| 3             | 7             | 0           | -1.109914               | -0.121788 | -0.059588 |
| 4             | 6             | 0           | 0.078805                | 2.088501  | -0.000963 |
| 5             | 6             | 0           | 2.490316                | 0.241911  | 0.001639  |
| 6             | 6             | 0           | -2.496882               | 0.332632  | -0.001655 |
| 7             | 6             | 0           | 0.728644                | -1.603614 | -0.055694 |
| 8             | 6             | 0           | -0.808582               | -1.565598 | 0.054900  |
| 9             | 1             | 0           | 0.659358                | 2.438325  | -0.859883 |
| 10            | 1             | 0           | 0.574273                | 2.440449  | 0.909158  |
| 11            | 1             | 0           | -0.908643               | 2.542330  | -0.046555 |
| 12            | 1             | 0           | 2.911712                | 0.028159  | -0.986794 |
| 13            | 1             | 0           | 3.060332                | -0.304658 | 0.757119  |
| 14            | 1             | 0           | 2.577838                | 1.308076  | 0.205807  |
| 15            | 1             | 0           | -2.915874               | 0.150921  | 0.993854  |
| 16            | 1             | 0           | -3.080156               | -0.221764 | -0.740848 |
| 17            | 1             | 0           | -2.569202               | 1.393351  | -0.233762 |
| 18            | 1             | 0           | 1.073188                | -1.990392 | -1.021357 |
| 19            | 1             | 0           | 1.201147                | -2.182337 | 0.741406  |
| 20            | 1             | 0           | -1.172065               | -1.935509 | 1.020114  |
| 21            | 1             | 0           | -1.309894               | -2.118792 | -0.742646 |

#### 4. References

- (1) (a) M. Denk, R. Lennon, R. Hayashi, R. West, A. V. Belyakov, H. P. Verne, A. Haaland, M. Wagner and N. Metzler, *J. Am. Chem. Soc.*, 1994, **116**, 2691; (b) M. Haaf, A. Schmiedl, T. A. Schmedake, D. A. Powell, A. J. Millevolte, M. Denk and R. West, *J. Am. Chem. Soc.*, 1998, **120**, 12714.
- (2) (a) J. B. Lambert and Y. Zhao, *Angew. Chem. Int. Ed. Engl.*, 1997, **36**, 400; (b) T. Müller, Y. Zhao and J. B. Lambert, *Organometallics*, 1998, **17**, 278; (c) J. B. Lambert, Y. Zhao, H. Wu, W. C. Tse and B. Kuhimann, *J. Am. Chem. Soc.* 1999, **121**, 5001; (c) A. Sekiguchi, T. Matsuno and M. Ichinohe, *J. Am. Chem. Soc.* 2000, **122**, 11250.
- (3) M. J. Frisch, G. W. Trucks, H. B. Schlegel, G. E. Scuseria, M. A. Robb, J. R. Cheeseman, V. G. Zakrzewski, J. A. Montgomery Jr., R. E. Stratmann, J. C. Burant, S. Dapprich, J. M. Millam, A. D. Daniels, K. N. Kudin, M. C. Strain, Ö. Farkas, J. Tomasi, V. Barone, M. Cossi, R. Cammi, B. Mennucci, C. Pomelli, C. Adamo, S. Clifford, J. Ochterski, G. A. Petersson, P. Y. Ayala, Q. Cui, K. Morokuma, P. Salvador, J. J. Dannenberg, D. K. Malick, A. D. Rabuck, K. Raghavachari, J. B. Foresman, J. Cioslowski, J. V. Ortiz, A. G. Baboul, B. B. Stefanov, G. Liu, A. Liashenko, P. Piskorz, I. Komáromi, R. Gomperts, R. L. Martin, D. J. Fox, T. Keith, M. A. Al-Laham, C. Y. Peng, A. Nanayakkara, M. Challacombe, P. M. W. Gill, B. Johnson, W. Chen, M. W. Wong, J. L. Andres, C. Gonzalez, M. Head-Gordon, E. S. Replogle, J. A. Pople, *Gaussian 98, Revision A.11*. Gaussian, Inc.: Pittsburgh, PA, 1998.
- (4) P. Flukiger, H. P. Luthi, S. Portmann and J. Weber, *MOLEKEL 4.3*; Swiss Center for Scientific Computing: Manno (Switzerland), 2000–2002.
